# Supplementary material for: The prevalence and survival of pulmonary hypertension due to left heart failure: A retrospective analysis of a multicenter prospective cohort study
Source: PubMed Central journal article supplement (PMC9378855; doi:10.3389/fcvm.2022.908215), 2022-08-02
Supplement: Data_Sheet_1.pdf [file Data_Sheet_1.pdf]

## **Supplementary materials**

**Supplementary Figure 1. (A)** Kaplan-Meier estimates of survival in PH-HFpEF patients with CAD and without CAD. **(B)** Kaplan-Meier estimates of survival in PH-HFrEF patients with CAD and without CAD.

**Supplementary Figure 2.** Kaplan-Meier estimates of survival in PH-LHF patients with CAD and without CAD that assumes patients who lost to follow-up all died **(A)**, or all alive **(B)**.

**Supplementary Figure 3. (A)** Kaplan-Meier estimates of survival in patients with CAD as defined by number of coronary artery stenosis vessels (Unknown, Single-vessel, Two-vessels, Three-vessels) and without CAD. **(B)** Kaplan-Meier estimates of survival in patients with CAD as defined by Gensini scores (Unknown, 2 – 40, 41 – 80, > 80) and without CAD. **(C)** Kaplan-Meier estimates of survival in patients with CAD as defined by ischemic cardiomyopathy (ICM) (with or without ICM) and without CAD.

**Supplementary Table 1.** Predict factors for PH-LHF in LHF patients in univariate and multivariate logistic regression model including center as random effect.

| Variables   | Crude OR (95%CI)    | Crude P value | Adj. OR (95%CI)     | Adj. P value |
|-------------|---------------------|---------------|---------------------|--------------|
| BMI/5       | 1.897 (1.282-2.808) | 0.013         | 1.297 (0.840-2.010) | 0.240        |
| NYHA FC     |                     |               |                     |              |
| II          |                     |               |                     |              |
| III/IV      | 2.574 (1.688-3.924) | < 0.001       | 1.618 (0.990-2.638) | 0.054        |
| Types of HF |                     |               |                     |              |
| HFpEF       |                     |               |                     |              |
| HFrEF       | 3.938 (2.379-6.519) | < 0.001       | 2.317 (1.340-4.033) | 0.003        |
| CAD         |                     |               |                     |              |
| No          |                     |               |                     |              |
| Yes         | 0.732 (0.449-1.191) | 0.209         | 1.083 (0.622-1.885) | 0.779        |
| HDL         | 0.545 (0.318-0.935) | 0.028         | 0.656 (0.364-1.183) | 0.162        |
| LAAPD/10    | 2.749 (1.746-4.328) | < 0.001       | 0.984 (0.551-1.759) | 0.958        |
| LVEDD/10    | 2.069 (1.533-2.792) | < 0.001       | 1.417 (0.953-2.106) | 0.085        |
| RVAPD/5     | 2.640 (1.774-3.928) | < 0.001       | 2.137 (1.316-3.480) | 0.002        |

PH-LHF, pulmonary hypertension due to left heart failure; LHF, left heart failure; Adj. OR, adjusted odds ratio; BMI, body mass index; NYHA FC, New York Heart Association Functional Class; HFrEF, heart failure with reduced ejection fraction; HFpEF, left ventricular diastolic dysfunction heart failure with preserved ejection fraction; CAD, coronary artery disease; HDL, high-density lipoprotein cholesterol; LAAPD, left atrial anteroposterior diameter; LVEDD, left ventricular end diastolic diameter; RVAPD, right ventricular anteroposterior diameter.

Supplementary Table 2. Predictors of mortality for PH-LHF patients in Cox proportional hazards regression model including center as random effect.

| Variables  | Crude HR (95%CI)    | Crude P value | Adj. HR (95%CI)     | Adj. P value |
|------------|---------------------|---------------|---------------------|--------------|
| Age        |                     |               |                     |              |
| ≤65        |                     |               |                     |              |
| >65        | 1.746 (1.099-2.773) | 0.018         |                     |              |
| NYHA FC    |                     |               |                     |              |
| II         |                     |               |                     |              |
| III/IV     | 2.116 (1.340-3.340) | 0.001         | 1.627 (1.007-2.627) | 0.047        |
| HF         |                     |               |                     |              |
| HFpEF      |                     |               |                     |              |
| HFrEF      | 1.747 (1.100-2.775) | 0.018         |                     |              |
| CAD        |                     |               |                     |              |
| No         |                     |               |                     |              |
| Yes        | 1.166 (0.648-2.100) | 0.608         |                     |              |
| Hemoglobin |                     |               |                     |              |
| ≤120       |                     |               |                     |              |
| >120       | 0.490 (0.303-0.793) | 0.004         | 0.574 (0.351-0.938) | 0.027        |
| BUN        |                     |               |                     |              |
| ≤5.5       |                     |               |                     |              |
| >5.5       | 1.654 (1.046-2.617) | 0.031         |                     |              |
| sPAP       |                     |               |                     |              |
| ≤50        |                     |               |                     |              |
| >50        | 2.543 (1.613-4.010) | <0.001        | 2.177 (1.359-3.488) | 0.001        |
| dPAP       |                     |               |                     |              |
| ≤25        |                     |               |                     |              |
| >25        | 1.635 (1.006-2.658) | 0.047         |                     |              |
| mPAP       |                     |               |                     |              |
| ≤30        |                     |               |                     |              |
| >30        | 1.789 (1.134-2.825) | 0.012         |                     |              |
| Af         |                     |               |                     |              |
| No         |                     |               |                     |              |
| Yes        | 1.689 (0.775-3.680) | 0.188         |                     |              |

PH-LHF, pulmonary hypertension due to left heart failure; Adj. HR, adjusted hazard ratio; NYHA FC, New York Heart Association Functional Class; HFrEF, heart failure with reduced ejection fraction; HFpEF, left ventricular diastolic dysfunction heart failure with preserved ejection fraction; CAD, coronary artery disease; BUN, blood urea nitrogen; sPAP, systolic pulmonary artery pressure; dPAP, diastolic pulmonary artery pressure; mPAP, mean pulmonary artery pressure; Af, atrial fibrillation.

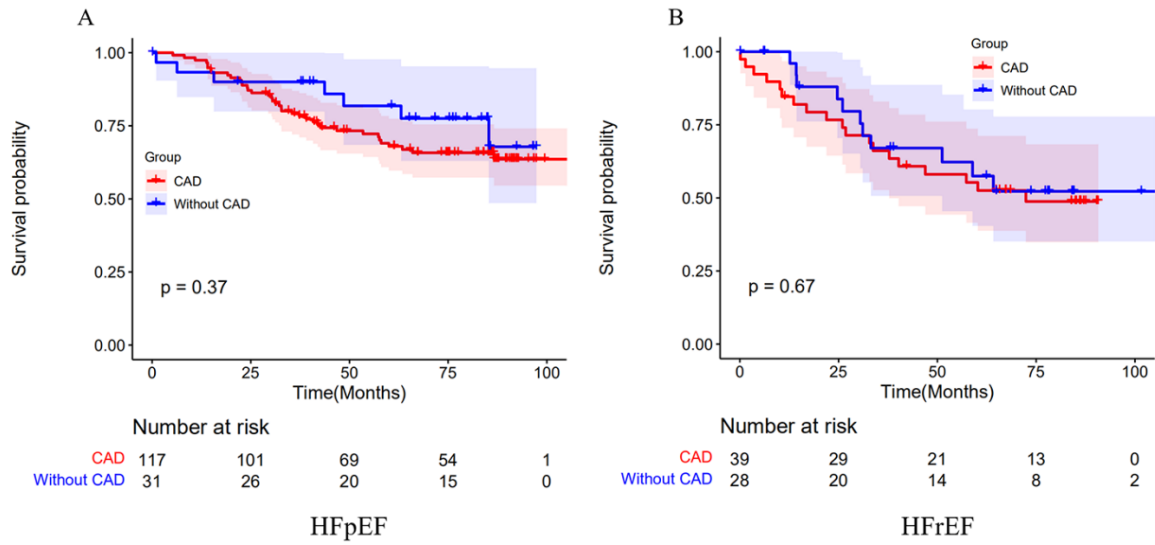

**Supplementary Figure 1. (A)** Kaplan-Meier estimates of survival in PH-HFpEF patients with CAD and without CAD. **(B)** Kaplan-Meier estimates of survival in PH-HFrEF patients with CAD and without CAD.

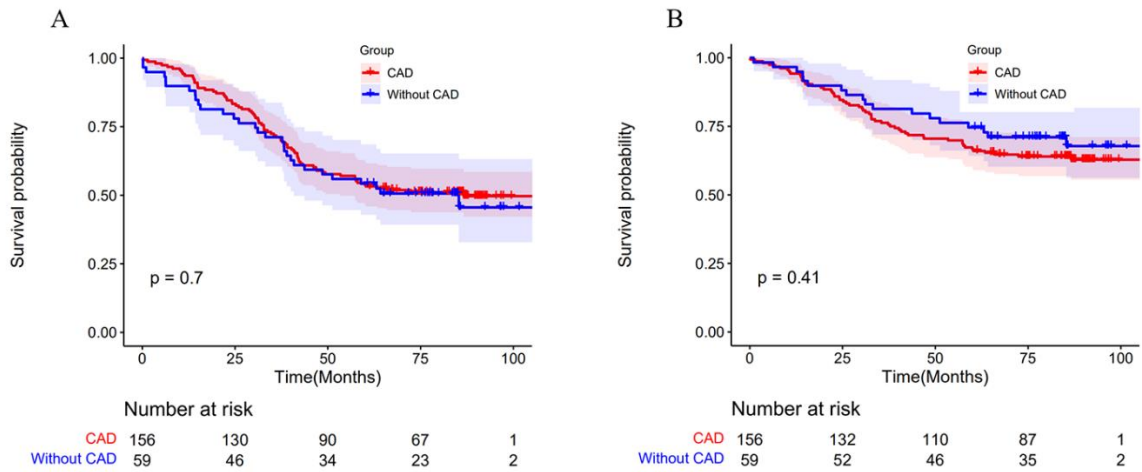

**Supplementary Figure 2.** Kaplan-Meier estimates of survival in PH-LHF patients with CAD and without CAD that assumes patients who lost to follow-up all died **(A)**, or all alive **(B)**.

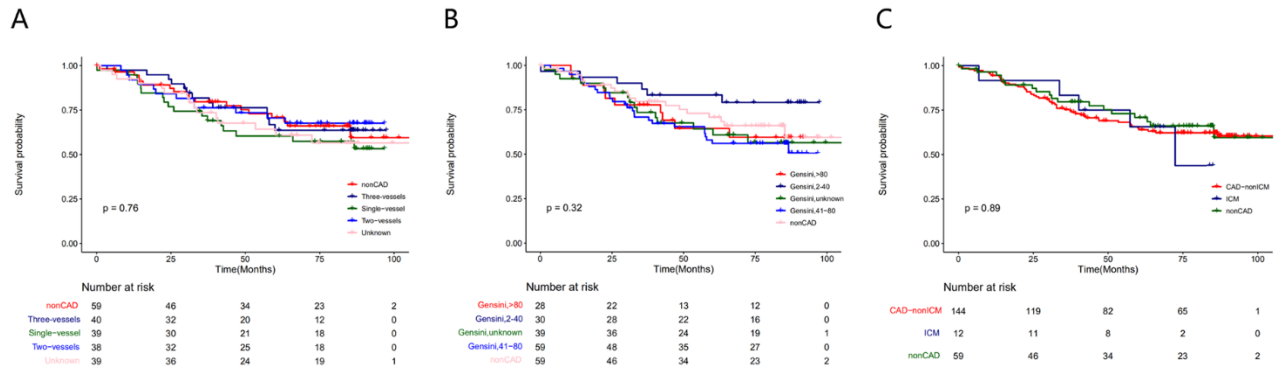

**Supplementary Figure 3. (A)** Kaplan-Meier estimates of survival in patients with CAD as defined by number of coronary artery stenosis vessels (Unknown, Single-vessel, Two-vessels, Three-vessels) and without CAD. **(B)** Kaplan-Meier estimates of survival in patients with CAD as defined by Gensini scores (Unknown, 2 – 40, 41 – 80, > 80) and without CAD. **(C)** Kaplan-Meier estimates of survival in patients with CAD as defined by ischemic cardiomyopathy (ICM) (with or without ICM) and without CAD.
